# Supplementary material for: Outbreak of Fusarium solani Meningitis in Immunocompetent Persons Associated With Neuraxial Blockade in Durango, Mexico, 2022–2023
Source: PubMed Central journal article supplement (PMC10873708; doi:10.1093/ofid/ofad690), 2024-01-04
Supplement: ofad690_supplementary_data.pdf [file ofad690_supplementary_data.pdf]

ROC of Antifungal Treatment

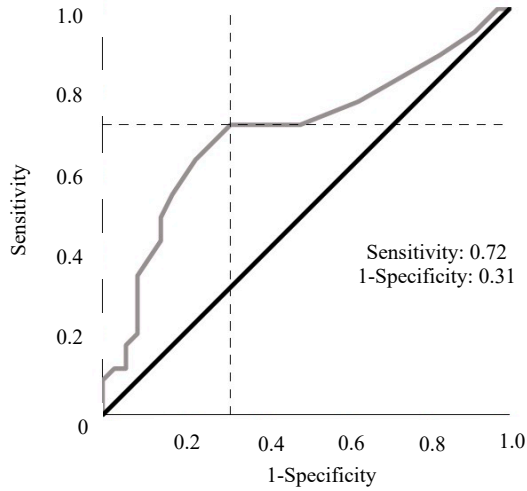

| Area Under Curve | SE    | p-value | 95% Confidence Interval |             |
|------------------|-------|---------|-------------------------|-------------|
|                  |       |         | Lower limit             | Upper limit |
| 0.696            | 0.065 | 0.005   | 0.569                   | 0.823       |

**Supplementary figure 1.** Voriconazole and Amphotericin B therapeutic time window. The Receiver Operator Characteristic (ROC) curve of antifungal treatment onset days during hospitalization stays and its association with death and survival outcomes. Abbreviations: CI, Confidence interval.
